# Supplementary material
Source: HighWire-hosted journal article supplement (https://mentalhealth.bmj.com/content/22/3/125)
Supplement: inline-supplementary-material-1 [file inline-supplementary-material-1.docx]

**SUPPLEMENT 1**

Studies referred to in Table 2, that were included in the discussed review by Belsher *et al*.

1. Amini P, Ahmadinia H, Poorolajal J, Moqaddasi Amiri M. Evaluating the high risk groups for suicide: a comparison of logistic regression, support vector machine, decision tree and artificial neural network. *Iran J Public Health* 2016;45(9):1179-1187.
2. Barak-Corren Y, Castro VM, Javitt S, Hoffnagle AG, Dai Y, Perlis RH, *et al.* Predicting suicidal behaviour from longitudinal electronic health records. *Am J Psychiatry* 2017;174 (2):154-162.
3. Choi SB, Lee W, Yoon JH, Won JU, Kim DW. Ten-year prediction of suicide death using Cox regression and machine learning in a nationwide retrospective cohort study in South Korea. *J Affect Disord* 2018;231:8-14.
4. DelPozo-Banos M, John A, Petkov N, Berridge DM, Southern K, Lloyd K, *et al.* Using neural networks with routine health records to identify suicide risk: feasibility study. *JMIR Ment Health* 2018;5(2):e10144.doi:10.2196/10144.
5. Ilgen MA, Downing K, Zivin K, Hoggatt KJ, Kim M, Ganoczy D, *et al.* Exploratory data mining analysis identifying subgroups of patients with depression who are at high risk for suicide. *J Clin Psychiatry* 2009;70(11):1495-1500.
6. Kessler RC, Warner CH, Ivany C, Petukhova MV, Rose S, Bromet EJ, *et al.* Army STARRS collaborators. Predicting suicides after psychiatric hospitalization in US Army soldiers: the Army Study To Assess Risk and rEsilience in Service members (Army STARRS). *JAMA Psychiatry* 2015;72(1):49-57.
7. Kessler RC, Stein MB, Petukhova MV, Bliese P, Bossarte RM, Bromet EJ, *et al.* Army STARRS collaborators. Predicting suicides after outpatient mental health visits in the Army Study to Assess Risk and Resilience in Service members (Army STARRS). *Mol Psychiatry* 2017;22(4):544-551.
8. Kessler RC, Hwang I, Hoffmire CA, McCarthy JF, Petukhova MV, Rossellini AJ, *et al.* Developing a practical suicide risk prediction model for targeting high-risk patients in the Veterans Health Administration. *Int J Methods Psychiatr Res* 2017;26(3):e1575.
9. McCarthy JF, Bossarte RM, Katz IR, Thompson C, Kemp J, Hannemann CM, *et al.* Predictive modelling and concentration of the risk of suicide: implications for preventive interventions in the US Department of Veterans Affairs. *Am J Public Health* 2015;105(9):1935-1942.
10. Simon GE, Johnson E, Lawrence JM, Rossom RC, Ahmedani B, Lynch FL, *et al.* Predicting suicide attempts and suicide deaths following outpatient visits using electronic health records. *Am J Psychiatry* 2018;175(10):951-960.
